# Supplementary material for: DNA analysis of molluscs from a museum wet collection: a comparison of different extraction methods
Source: BMC Res Notes. 2016 Jul 18;9:348. doi: 10.1186/s13104-016-2147-7 (PMC4950716; doi:10.1186/s13104-016-2147-7)
Supplement: Supplementary file 1 — 10.1186/s13104-016-2147-7 In the additional file a detailed list of all samples used in this study can be found, including sample age and the inventory numbers. Furthermore, the DNA concentration [ng/µl] for both extraction methods (Promega-THK and the Gen-ial-ATK) and the formaldehyde content [mg/l] are given. The PCR success of all samples is indicated as well. [file 13104_2016_2147_MOESM1_ESM.xlsx]

## Sheet: Tabelle1
Additional file 1: Detailed list of all samples used and their PCR success as well as the DNA concentration [ng/µl], for the Promega-THK and the Gen-ial-ATK extraction methods. (/… no measurement possible)
					Promega - THK								Gen-ial - ATK
					1. Test					2. Test			1. Test					2. Test
Species		Age	Formol [mg/l]	Number NHMW	COI-lf	16S-sf	COI-sf1	COI-sf2	COI-sf3	COI-lf	16S-sf	DNA conc.	COI-lf	16S-sf	COI-sf1	COI-sf2	COI-sf3	COI-lf	16S-sf	DNA conc.
Acanthopleura brevispinosa (Sowerby, 1840)		1895	0	37333 A1	-	x				-	x	1.61809	x	x				-	x	4.79671
				37333 A2	-	x				-	x	3.92852	-	x				x	x	5.60844
				37333 B1	-	x				-	x	7.2628	x	x				x	x	3.74727
				37333 B2	-	x				-	x	3.59543	x	x				x	x	5.97208
Acanthopleura brevispinosa (Sowerby, 1840)		1895	0	37334 A1	x	x				-	x	1.2079	x	x				x	x	9.05343
				37334 A2	x	x				-	x	3.00898	x	x				x	x	3.8625
				37334 B1	x	x				-	x	0.8	x	x				x	x	1.75
				37334 B2	x	x				x	x	16.69	x	x				x	x	2.12743
Aegopis verticillus (Lamarck, 1822)		1912	0-10	73992 A1	-	x				-	x	6.21118	-	x				-	x	0.148199
				73992 A2	-	x				-	x	8.26986	-	x				-	x	3.34719
				73992 B1	-	x				-	x	7.65494	-	x				-	x	3.65447
				73992 B2	-	-				-	x	8.60469	-	x				-	x	3.22357
Aegopis verticillus (Lamarck, 1822)		1897	0	25272 A1	-	-				-	-	8.7781	-	x				-	x	3.58112
				25272 A2	-	-				-	-	9.94338	-	-				-	x	3.74163
				25272 B1	-	-				-	-	7.00822	-	-				-	-	4.34595
				25272 B2	-	-				-	-	11.2772	-	x				-	x	3.94904
Aplysia dactylomela Rang, 1828		1955 (+)	0	73532 A1	-	-				-	-	5.80691	-	-				-	-	4.3675
				73532 A2	-	-				-	-	3.80307	-	-				-	-	2.11034
				73532 B1	x	-				-	-	6.65582	-	-				-	-	3.27171
				73532 B2	-	-				-	-	7.07261	-	-				-	-	2.95866
Aplysia dactylomela Rang, 1828		1955 (+)	0	73533 A1	-	-				-	x	2.8513	-	-				x	-	4.53831
				73533 A2	/	/				/	/	/	-	-				-	-	3.54034
				73533 B1	-	-				-	x	8.96832	-	-				-	-	2.94345
				73533 B2	x	-				-	x	10.9986	-	-				-	-	3.36599
Aplysia dactylomela Rang, 1828		1958	0	21012 A1	-	-				-	-	20.6323	-	-				-	-	6.76074
				21012 A2	-	-				-	-	9.53727	-	-				-	-	5.49904
				21012 B1	-	-				-	x	14.1094	-	-				-	-	4.46667
				21012 B2	-	-				-	x	12.3507	-	-				-	-	6.06627
Arianta arbustorum (Linné, 1758)		1989	0	89915 A1	x	x				-	x	25.8241	x	x				x	x	32.6339
				89915 A2	x	x				-	x	7.41058	x	x				x	x	38.7064
				89915 B1	-	x				-	x	6.80675	x	x				-	x	4.94303
				89915 B2	x	x				-	x	9.62767	x	x				x	x	14.5297
Arianta arbustorum (Linné, 1758)		1991	0	86813 A1	x	x				-	x	6.50279	x	x				x	x	6.33849
				86813 A2	x	x				x	x	4.87225	x	x				x	x	7.34608
				86813 B1	-	x				-	x	39.1137	x	x				x	x	1.36461
				86813 B2	x	x				-	x	7.23526	x	x				x	x	11.1709
Arianta arbustorum (Linné, 1758)		1992	0	100810 A1	x	x				x	x	6.06681	x	x				x	x	7.37783
				100810 A2	x	x				x	x	9.61136	x	x				x	x	23.2925
				100810 B1	x	x				x	x	5.69623	x	x				-	x	3.40573
				100810 B2	x	x				x	x	9.81816	x	x				x	x	/
Arion subfuscus (Draparnaud, 1805)		1999	0	100806 A1	-	x				-	x	5.62885	-	x				-	x	9.1
				100806 A2	-	x				-	x	7.06685	-	x				-	x	9.78166
				100806 B1	-	x				-	x	5.88732	-	x				-	x	3.33617
				100806 B2	-	x				-	x	27.6828	-	x				x	x	34.1
Arion subfuscus (Draparnaud, 1805)		1885	0	31599 A1	-	-				-	-	/	-	-				-	-	3.3736
				31599 A2	-	-				-	-	3.63985	-	-				-	-	3.19723
				31599 B1	-	-				-	x	/	-	-				-	-	4.40869
				31599 B2	-	-				-	x	1.0232	-	-				-	-	3.42792
Arion subfuscus (Draparnaud, 1805)		1886	0	31600 A1	-	-				-	-	/	-	-				-	-	2.19766
				31600 A2	-	-				-	-	6.33198	-	-				-	-	2.55271
				31600 B1	-	-				-	x	5.82397	-	-				-	-	2.79563
				31600 B2	-	-				-	-	0.529807	-	-				-	-	1.87892
Cepaea nemoralis (Linné, 1758)		1889 (+)	0	016017 A1	-	x	-	-	-	-	x	53.8785	-	x	x	-	-	-	x	3.31359
				016017 A2	-	x	-	-	-	-	x	53.8225	-	x	x	x	-	-	-	4.46445
				016017 B1	-	x	x	x	-	-	x	8.26322	-	x	x	x	-	-	-	4.34198
				016017 B2	-	x	-	-	-	-	x	/	-	x	x	x	-	-	x	7.73431
Cepaea nemoralis (Linné, 1758)		1892	0	019158 A1	-	-	-	-	-	x	-	17.1784	x	x	-	-	-	-	x	14.7789
				019158 A2	x	-	-	-	-	x	-	3.16009	-	x	-	-	-	-	x	6.87845
				019158 B1	-	-	-	-	-	x	-	8.38486	-	x	-	-	-	-	x	8.77278
				019158 B2	-	x	-	-	-	x	x	18.3935	-	x	-	-	-	-	x	10.911
Cepaea nemoralis (Linné, 1758)		1892	0	19185 A1	-	x	x	-	-	-	x	8.37573	x	x	x	x	x	-	x	7.5914
				19185 A2	-	x	x	x	-	-	x	22.8725	x	x	x	x	x	-	x	10.0466
				19185 B1	-	x	-	-	-	-	x	30.3096	x	x	x	x	x	-	x	12.0175
				19185 B2	-	x	-	-	-	-	x	44.8616	-	x	x	x	x	-	x	15.224
Cepaea nemoralis (Linné, 1758)		1895	>>100	023361 A1	-	-	-	-	-	-	-	9.90614	-	-	-	-	x	-	-	3.65337
				023361 A2	-	-	-	-	-	x	-	1.83985	-	x	-	-	-	-	-	2.8426
				023361 B1	-	-	-	x	-	x	-	14.8412	-	-	-	-	-	-	-	3.63649
				023361 B2	-	-	-	-	-	-	-	2.76244	-	-	-	-	-	-	-	4.11537
Cepaea nemoralis (Linné, 1758)		1895	0	023362 A1	-	x	-	-	-	-	x	24.3654	x	x	x	x	-	-	x	8.53961
				023362 A2	-	x	x	x	-	-	x	9.37126	x	x	x	-	-	-	x	5.9
				023362 B1	-	x	-	-	-	-	x	44.9678	x	x	x	-	-	-	x	5.1977
				023362 B2	-	x	x	x	-	-	-	15.4427	-	x	x	x	-	-	x	4.28546
Cepaea nemoralis (Linné, 1758)		1897	0	025276 A1	-	-	-	-	-	-	-	12.8573	-	x	x	-	-	-	-	5.33207
				025276 A2	-	-	-	x	-	-	-	7.27311	-	x	x	-	-	-	x	6.98176
				025276 B1	-	-	-	-	-	-	-	1.26098	x	x	x	-	-	-	x	5.22512
				025276 B2	x	-	-	-	-	x	-	4.44737	-	x	x	-	-	-	x	8.70399
Cepaea nemoralis (Linné, 1758)		1972	0	77921 A1	-	x	-	-	-	-	x	10.493	-	x	-	x	-	-	x	4.68877
				77921 A2	-	x	x	x	-	-	x	11.9908	-	x	-	x	-	-	x	5.93508
				77921 B1	-	x	x	x	x	-	x	3.19374	-	x	-	x	-	-	x	3.78732
				77921 B2	-	x	x	x	-	-	x	8.611	-	x	-	x	-	-	x	4.14113
Cepaea nemoralis (Linné, 1758)		1973	0	74401A1	-	x	x	x	x	x	x	4.39051	-	x	x	x	x	-	x	6.38456
				74401A2	-	x	x	x	x	x	x	8.54855	-	x	x	x	x	-	x	4.5699
				74401B1	-	x	x	x	x	x	x	10.4308	-	x	x	x	x	-	x	8.59082
				74401B2	-	x	x	x	x	x	x	5.66244	-	x	x	x	x	-	-	8.48061
Cepaea nemoralis (Linné, 1758)		1973	0-10	79088 A1	x	x	x	x	-	-	x	6.7994	-	x	x	x	-	-	x	4.54893
				79088 A2	-	x	x	x	-	-	x	26.9155	-	x	-	x	-	-	x	4.42065
				79088 B1	-	x	x	x	x	-	x	7.69803	-	x	-	x	-	-	-	3.66777
				79088 B2	-	x	x	x	x	-	x	17.3073	x	x	-	x	-	-	x	3.93829
Cepaea nemoralis (Linné, 1758)		1974	0	87076 A1	-	x	x	x	-	-	x	8.21424	-	x	-	x	-	-	x	7.44034
				87076 A2	-	x	x	x	-	-	x	5.38233	-	x	-	-	-	-	-	3.89599
				87076 B1	-	x	-	x	-	-	x	7.99828	-	x	-	-	-	-	x	9.19296
				87076 B2	-	x	x	x	-	-	x	4.75211	-	x	-	-	-	-	x	9.85875
Deroceras reticulatum (Müller, 1774)		1886	0	31593 A1	-	-				-	-	9.79611	-	-				-	-	4.051
				31593 A2	x	-				-	x	7.6792	-	-				-	-	4.70523
				31593 B1	-	-				-	-	8.12955	-	-				-	-	4.1665
				31593 B2	-	-				-	-	9.07697	-	-				-	-	4.62271
Deroceras reticulatum (Müller, 1774)		1908	0	45139 A1	-	-				-	-	10.6905	-	-				-	-	5.57418
				45139 A2	-	-				-	-	16.4114	-	-				-	x	6.56192
				45139 B1	-	-				-	-	14.3302	-	-				-	-	10.4595
				45139 B2	-	-				-	-	9.13959	-	-				-	-	4.10932
Dreissena polymorpha (Pallas, 1771)		1994	0	89907 A1	x	-	x	-	x	x	-	/	x	-	x	x	x	x	-	4.20081
				89907 A2	x	-	x	-	x	x	-	1.60504	x	-	x	x	x	x	-	5.30304
				89907 B1	x	-	x	-	x	x	-	58.9074	x	-	x	x	x	x	-	5.20103
				89907 B2	-	-	x	-	x	x	-	/	x	-	x	x	x	x	-	4.05565
Dreissena polymorpha (Pallas, 1771)		1994	0	89905 A1	x	-	x	-	x	x	-	0.303859	-	x	x	x	x	x	-	3.74404
				89905 A2	x	-	x	-	x	x	-	/	x	-	x	x	x	x	-	4.71363
				89905 B1	x	x	x	-	x	x	-	/	x	-	x	x	x	x	-	4.30431
				89905 B2	x	-	x	-	x	x	-	/	x	x	x	x	x	x	-	4.92928
Dreissena polymorpha (Pallas, 1771)		1994	0	89906 A1	x	-	x	-	x	-	-	/	x	-	x	x	x	x	-	3.54219
				89906 A2	/	/	/	/	/	/	/	/	x	-	x	x	x	x	-	4.45732
				89906 B1	-	-	x	-	x	x	-	/	x	-	x	x	x	x	-	4.04697
				89906 B2	x	-	x	-	x	x	-	4.24136	x	-	x	x	x	x	-	4.68352
Dreissena polymorpha (Pallas, 1771)		1991	0	101710 A1	x	-	x	x	x	x	-	4.28079	-	-	x	x	x	x	-	8.94707
				101710 A2	x	-	x	-	x	x	-	2.07175	x	-	x	x	x	x	-	6.6816
				101710 B1	x	-	x	-	x	-	-	6.4316	x	-	x	x	x	x	-	15.6558
				101710 B2	x	-	x	-	x	-	-	1.41645	x	-	x	x	x	x	-	6.63418
Dreissena polymorpha (Pallas, 1771)		1991	0	101711 A1	-	-	x	-	x	x	-	4.97408	x	-	x	x	x	-	-	7.86097
				101711 A2	x	-	x	-	x	-	-	0.594145	-	-	x	x	x	-	-	6.04737
				101711 B1	x	-	x	-	x	x	-	0.976313	x	-	x	x	x	x	-	5.08559
				101711 B2	x	-	x	-	x	x	-	2.42388	x	-	x	x	x	x	-	4.72971
Dreissena polymorpha (Pallas, 1771)		1991	0	101850 A1	x	-	x	x	x	x	-	4.90435	x	-	x	x	x	x	-	12.4226
				101850 A2	x	-	x	-	x	x	-	11.2299	x	-	x	x	x	x	-	9.57043
				101850 B1	x	-	x	x	x	x	-	2.04274	x	-	x	x	x	x	-	6.15446
				101850 B2	x	-	x	x	x	x	-	4.58232	x	-	x	x	x	-	-	5.92808
Dreissena polymorpha (Pallas, 1771)		1891	0	019505 A1	-	-	-	-	-	x	-	0.829684	-	-	-	x	-	-	-	7.03943
				019505 A2	-	x	-	-	-	-	-	9.44429	x	-	-	x	x	-	-	7.32184
				019505 B1	-	x	-	-	-	-	-	1.0493	-	-	-	-	-	-	-	6.8309
				019505 B2	-	-	-	-	-	-	-	2.49598	x	-	-	-	-	-	-	6.99807
Dreissena polymorpha (Pallas, 1771)		1891	0	019513 A1	-	-	x	x	-	-	-	3.2635	-	-	-	x	x	-	-	6.98838
				019513 A2	-	-	-	-	x	-	-	2.9745	-	-	-	x	x	-	-	6.94275
				019513 B1	-	x	-	-	x	-	-	9.43373	-	-	-	-	-	-	-	8.08255
				019513 B2	-	x a	x	x	-	-	-	12.1526	-	-	-	-	x	-	-	9.39971
Dreissena polymorpha (Pallas, 1771)		1994	0	83846 A1	-	-	-	x	x	-	-	/	x	x	x	x	x	x	x	14.6679
				83846 A2	x	-	x	x	x	-	x	4.7	x	x	x	x	x	x	x	11.2431
				83846 B1	x	-	x	x	x	x	-	17.3845	x	x	x	x	x	x	x	15.2847
				83846 B2	x	-	x	x	x	x	-	3.96105	x	x	x	x	x	x	-	23.9353
Dreissena polymorpha (Pallas, 1771)		1994	0	83847 A1	x	-	x	x	x	x	-	58.1136	x	x	x	x	x	x	-	23.7782
				83847 A2	x	-	x	x	x	x	-	11.1616	x	x	x	x	x	-	-	13.8176
				83847 B1	x	-	x	-	x	x	-	11.3183	x	-	x	x	x	x	-	7.18869
				83847 B2	-	x	-	-	-	-	-	2.02026	x	x	x	x	x	x	-	31.6
Dreissena polymorpha (Pallas, 1771)		1994	0	89911 A1	x	-	x	x	x	-	x	1.21641	x	-	x	x	x	x	-	6.58091
				89911 A2	x	-	x	x	x	-	-	3.63309	x	-	x	x	x	x	-	6.53322
				89911 B1	x	-	x	x	x	-	-	3.28518	x	-	x	x	x	x	-	6.21918
				89911 B2	x	-	x	x	x	-	-	2.25799	x	-	x	x	x	x	-	6.29002
Dreissena polymorpha (Pallas, 1771)		1892	0	019538 A1	-	-	-	-	x	x	-	5.30171	-	-	-	x	x	-	x	12.6458
				019538 A2	-	-	-	-	x	x	-	1.71725	-	-	-	x	x	-	-	8.48048
				019538 B1	-	-	x	x	x	x	-	14.2091	x	-	-	x	x	-	-	8.13322
				019538 B2	-	x	-	x	x	x	-	5.50542	x	-	x	x	x	-	-	7.82903
Dreissena polymorpha (Pallas, 1771)		1985	0	84428 A1	x	-	x	x	x	-	-	3.17406	x	-	x	x	x	x	-	7.72464
				84428 A2	x	-	x	x	x	-	x	28.8	x	-	x	x	x	x	-	9.21743
				84428 B1	x	-	x	x	x	x	-	3.58622	x	-	x	x	x	x	-	13.2305
				84428 B2	x	-	x	x	x	-	-	3.65578	x	-	x	x	x	x	-	6.16022
Dreissena polymorpha (Pallas, 1771)		1991	0	101721 A1	-	-	x	-	x	x	-	7.82274	-	-	x	x	x	-	-	11.6155
				101721 A2	x	-	x	x	x	x	-	4.59206	x	-	x	x	x	-	-	6.76056
				101721 B1	x	-	x	x	x	x	-	3.15731	x	-	x	x	x	-	-	7.37399
				101721 B2	-	-	x	x	x	x	-	2.97363	x	-	x	x	x	-	-	7.17692
Dreissena polymorpha (Pallas, 1771)		1950	0	248 A1	-	-	-	-	-	-	-	7.05607	-	-	-	-	x	-	-	3.79433
				248 A2	-	-	-	-	-	-	-	9.52659	-	-	-	-	x	-	-	3.6474
				248 B1	-	-	-	-	-	-	-	/	-	-	x	-	x	-	-	4.07585
				248 B2	-	-	-	-	-	-	-	10.9488	-	-	x	-	x	-	-	4.94149
Dreissena polymorpha (Pallas, 1771)		1924	40-60	55324 A1	-	-	-	-	-	-	-	5.66823	-	-	-	-	-	-	-	4.77382
				55324 A2	-	-	-	-	-	-	-	19.5	-	-	-	-	-	-	-	4.50165
				55324 B1	-	-	-	-	-	-	x	12.5517	-	-	-	-	-	-	-	3.07306
				55324 B2	-	-	-	-	-	-	-	13.519	-	-	-	-	-	-	-	3.6882
Helix pomatia Linné, 1758		1891	0	74149 A1	-	x				-	x	7.98584	-	x				-	x	20.7918
				74149 A2	-	-				-	x	26.3683	-	x				-	x	6.52444
				74149 B1	-	x				-	x	9.9965	x	x				-	x	5.23478
				74149 B2	-	x				-	x	21.7222	-	x				-	x	3.99071
Helix pomatia Linné, 1758		1993	0	101290 A1	-	x				-	x	11.5702	-	x				-	x	4.68165
				101290 A2	x	x				-	x	13.8972	-	x				-	x	14.8555
				101290 B1	-	x				-	x	11.7972	-	x				-	x	15.1853
				101290 B2	-	x				-	x	8.71145	-	x				x	x	23.2607
Helix pomatia Linné, 1758		1973	0	74402 A1	-	x				-	x	20.0552	-	x				-	x	2.62141
				74402 A2	x	x				-	x	20.9696	-	x				-	x	2.32575
				74402 B1	x	x				-	x	7.7796	-	x				-	x	3.50854
				74402 B2	x	x				-	x	8.73703	-	x				-	x	2.64434
Limax cinereoniger Wolf, 1803		1900	0	33545 A1	-	-				-	-	7.86115	-	x				-	x	9.65381
				33545 A2	-	-				-	-	7.64779	-	x				-	x	7.25443
				33545 B1	-	-				-	-	5.96056	-	x				-	x	11.4095
				33545 B2	-	-				-	-	7.25095	-	x				-	x	12.6433
Limax cinereoniger Wolf, 1803		1926	0	77517 A1	-	x				-	x	17.198	-	-				-	x	5.65563
				77517 A2	-	-				-	x	7.55247	-	-				-	x	5.79601
				77517 B1	-	x				-	x	6.70679	-	x				-	x	7.25175
				77517 B2	-	x				-	x	5.11847	-	x				-	x	8.06387
Limax maximus Linné, 1758		1886	0	31574 A1	-	-				-	x	6.21744	-	-				-	-	3.88291
				31574 A2	-	-				-	-	6.50033	-	-				-	-	7.92834
				31574 B1	-	-				-	-	11.1593	-	-				-	x	2.82557
				31574 B2	-	-				-	x	12.9942	-	-				-	-	5.57681
Limax maximus Linné, 1758		1877	0	77545 A1	-	-				-	-	6.42666	x	-				-	-	1.5
				77545 A2	-	-				-	x	3.04747	-	-				-	-	4.18579
				77545 B1	-	-				-	x	3.26934	-	-				-	-	2.92924
				77545 B2	-	-				-	x	3.78325	-	-				-	x	4.04046
Limax maximus Linné, 1758		1885	0	31576 A1	-	-				-	x	1.67348	-	-				-	-	3.19848
				31576 A2	-	-				-	-	2.18931	-	-				-	-	3.34482
				31577 B1	-	-				-	x	5.76416	-	-				-	-	2.60459
				31577 B2	-	-				-	-	3.24956	-	-				-	-	3.55513
Lymnaea stagnalis (Linné, 1758)		1987	0	86667 A1	-	x				-	-	1.409	x	x				-	x	1.77641
				86667 A2	-	x				-	x	4.73859	-	x				x	x	14.4126
				86667 B1	-	-				-	x	0.901782	x	x				-	x	10.6755
				86667 B2	x	x				-	x	2.08053	-	x				-	x	11.827
Lymnaea stagnalis (Linné, 1758)		1997	0	101939 A1	-	x				-	x	1.30487	-	x				-	x	14.7444
				101939 A2	-	-				-	x	1.59384	-	x				-	x	1.72982
				101939 B1	-	-				-	-	3.12487	-	x				-	x	8.21272
				101939 B2	-	-				-	x	0.182133	-	x				-	x	5.91785
Lyncina carneola (Linné, 1758)		1897	0	037238 A1	-	x				-	x	2.9587	-	x				-	-	8.65943
				037238 A2	-	x				-	-	11.6703	-	x				-	x	10.6567
				037238 B1	-	-				-	-	10.1792	-	x				-	-	12.2274
				037238 B2	-	-				-	-	19.1005	-	x				-	x	13.4623
Lyncina carneola (Linné, 1758)		1897	0	037237 A1	-	x				-	-	7.79394	-	-				-	-	3.94152
				037237 A2	-	-				-	-	18.5842	-	-				-	-	5.70646
				037237 B1	-	-				-	-	5.49421	-	-				-	-	5.97057
				037237 B2	-	-				-	-	4.57954	-	-				-	x	6.62765
Malacolimax tenellus (Müller, 1774)		1885	0	031587 A1	x	-				-	-	2.1598	-	x				-	-	1.20558
				031587 A2	x	-				-	-	0.744729	-	-				-	-	5.22214
				031587 B1	-	-				-	-	2.5102	-	-				-	-	4.10021
				031587 B2	-	-				-	-	2.04702	-	-				-	-	4.1677
Malacolimax tenellus (Müller, 1774)		1885	0	031588 A1	-	-				-	-	/	-	-				-	-	7.32591
				031588 A2	-	-				-	-	6.36795	-	x				-	-	8.67451
				031588 B1	-	-				-	-	6.02711	-	-				-	-	13.366
				031588 B2	-	-				-	-	6.59578	-	-				-	-	9.58313
Mimachlamys varia (Linné, 1758)		1969	20-40	87212 A1	-	-				-	x	0.299348	x	-				-	-	1.73755
				87212 A2	-	-				-	x	0	x	-				-	x	0.770047
				87212 B1	-	-				-	x	0.603451	x	-				-	-	1.69193
				87212 B2	-	-				-	x	8.93641	-	-				-	-	0.30487
Mimachlamys varia (Linné, 1758)		1894	0	021777 A1	-	-				-	x	/	x	-				-	-	0.88352
				021777 A2	-	-				-	x	0.546724	-	-				-	-	1.69604
				021777 B1	-	-				-	x	2.61942	-	-				-	-	4.23398
				021777 B2	-	-				-	x	4.30197	-	-				-	-	1.29091
Nerita orbignyana Récluz, 1841		1897	0	037296 A1	-	-				-	-	4.12082	-	x				-	x	19.5571
				037296 A2	-	-				-	-	2.87242	-	x				-	-	6.13989
				037296 B1	-	-				-	-	2.92004	-	x				-	-	16.2299
				037296 B2	-	x				-	x	13.926	-	x				-	-	10.2285
Nerita orbignyana Récluz, 1841		1897	0	037298 A1	-	x				-	x	12.319	-	x				x	-	11.2
				037298 A2	-	-				-	x	8.22776	-	x				x	-	11.9026
				037298 B1	-	-				-	-	6.85692	-	-				-	-	7.66799
				037298 B2	-	-				-	-	9.39758	-	x				-	-	12.9928
Planorbis planorbis (Linné, 1758)		1991	0	86703 A1	-	-				-	-	20.3333	-	-				x	x	1.89575
				86703 A2	-	-				-	x	0.383684	-	x				x	x	3.75062
				86703 B1	x	x				-	x	/	-	x				-	x	3.13329
				86703 B2	-	-				-	-	0.266379	-	x				x	x	2.531
Planorbis planorbis (Linné, 1758)		1990	0	86681 A1	-	x				-	x	/	-	-				-	x	0.230069
				86681 A2	-	-				-	-	3.44059	-	x				-	x	4.86005
				86681 B1	-	x				-	x	1.2688	-	x				-	x	2.95022
				86681 B2	-	x				x	x	6.94892	x	x				-	x	1.0024
Planorbis planorbis (Linné, 1758)		1985	0	84060 A1	x	x				-	x	0.201952	x	x				-	x	0.623443
				84060 A2	x	x				-	x	0.98532	x	x				-	x	1.52013
				84060 B1	-	-				-	x	2.99392	x	x				-	x	2.33745
				84060 B2	-	-				-	x	1.00608	x	x				-	x	1.22002
Sepia plangon Gray, 1894		1884	0	55206 A1	-	-				-	-	2.00219	-	-				-	-	1.06761
				55206 A2	x	-				-	-	1.1041	-	-				-	x	1.16917
				55206 B1	-	-				-	-	2.55888	-	x				-	-	20.5719
				55206 B2	-	-				-	-	5.31763	-	-				-	-	9.43979
Sepia plangon Gray, 1894		1884	0	015467 A1	-	-				-	-	20.7551	x	-				-	-	13.4123
				015467 A2	-	-				-	-	1.68945	x	x				-	-	7.71122
				015467 B1	x	-				-	-	0.256376	-	-				-	-	4.23583
				015467 B2	-	-				-	-	9.58757	-	-				-	-	0.914956
Viviparus acerosus (Bourguignat, 1862)		1992	>>100	102198 A1	-	-	-	-	-	-	-	2.68494	-	-	x	-	x	-	-	1.56014
				102198 A2	-	-	-	-	-	-	-	4.60737	-	-	-	-	-	-	-	1.37454
				102198 B1	-	-	-	-	-	-	-	5.13604	-	-	-	-	-	-	-	4.12617
				102198 B2	-	-	-	-	-	-	-	0.576204	-	-	-	-	-	-	-	2.62936
Viviparus acerosus (Bourguignat, 1862)		1992	>>100	102197 A1	-	-	-	-	-	-	-	/	-	-	-	-	-	-	-	4.36379
				102197 A2	-	-	-	-	-	-	-	12.0996	-	-	-	-	-	-	-	4.45439
				102197 B1	-	-	-	-	-	-	-	5.3006	-	-	-	-	-	-	-	1.29946
				102197 B2	-	-	-	-	-	-	-	4.26386	-	-	-	-	x	-	-	1.70334
Viviparus acerosus (Bourguignat, 1862)		1969	0	77197 A1	-	x	-	-	-	-	x	5.33965	-	x	x	-	-	x	x	7.56184
				77197 A2	-	x	-	-	-	-	-	4.86256	-	x	-	-	-	x	x	15.6631
				77197 B1	-	x	-	-	-	-	-	5.0521	-	-	-	-	-	-	x	7.66469
				77197 B2	-	x	-	-	-	x	-	/	-	x	-	-	-	x	-	14.8852
Viviparus acerosus (Bourguignat, 1862)		1969	0	77201 A1	x	x	x	x	x	-	-	2.07176	-	x	x	-	x	x	x	7.97506
				77201 A2	x	x	x	x	x	-	x	3.11717	-	x	-	-	x	x	x	9.44231
				77201 B1	-	-	x	-	x	-	-	2.50463	-	x	-	-	-	-	-	4.19479
				77201 B2	-	-	x	-	x	-	-	3.18686	-	x	x	-	x	x	x	7.34318
Viviparus acerosus (Bourguignat, 1862)		1995	0	101984 A1	-	-	-	-	-	-	-	2.46851	-	-	-	-	-	-	-	3.34922
				101984 A2	-	-	-	-	x	-	-	3.32983	-	-	-	-	-	-	-	8.47499
				101984 B1	-	-	-	-	x	-	-	2.3297	-	-	-	-	-	-	-	3.99087
				101984 B2	-	-	-	-	x	-	-	2.95897	-	x	-	-	-	-	-	5.28361
Viviparus acerosus (Bourguignat, 1862)		1877	0	72362 A1	-	-	-	-	-	-	-	4.67239	-	-	-	-	-	-	-	9.07934
				72362 A2	-	-	-	-	-	-	-	5.17548	-	-	-	-	-	-	-	11.6023
				72362 B1	-	-	-	-	-	-	-	6.78513	-	-	-	-	-	-	-	6.78532
				72362 B2	-	-	-	-	-	-	-	5.27747	-	-	-	-	-	-	-	6.30039
Viviparus contectus (Millet, 1813)		1991	10	101694 A1	-	-	-	-	-	x	-	8.14569	-	-	-	-	-	-	-	3.48101
				101694 A2	-	-	-	-	-	-	-	5.30303	-	-	-	-	-	-	-	1.94206
				101694 B1	-	-	-	x	x	-	-	4.81697	-	-	-	-	-	-	x	2.72249
				101694 B2	-	-	-	-	-	-	-	4.80186	-	x	-	-	-	-	-	3.76213
Viviparus contectus (Millet, 1813)		1918 (+)	0	51317 A1	-	-	-	-	-	-	-	3.64627	-	-	-	x	-	-	-	6.2
				51317 A2	-	-	-	-	-	-	-	7.555	-	-	-	x	-	-	-	2.13461
				51317 B1	-	-	-	-	-	-	-	/	-	-	-	-	-	-	x	4.22975
				51317 B2	-	-	-	-	-	-	-	1.10463	-	-	-	-	x	-	-	2.06033
x …	positive result
- …	negative result
/	no reaction
